# Supplementary material for: Analysis of opacification patterns in intraocular lenses (IOL)
Source: HighWire-hosted journal article supplement (doi:10.1136/bmjophth-2020-000589), 2021-02-01
Supplement: bmjophth-2020-000589supp001_data_supplement.pdf [file bmjophth-2020-000589supp001_data_supplement.pdf]

- 1 **Figure legends**
- 2 Supplementary files
- 3 Supplementary Figure 1. IOL types overview
- 4 Supplementary Figure 2. Incidence of extraction of
- 5 opacified IOLs
- 6 Supplementary Figure 3. Numbers and models of
- 7 secondary IOLs
- 8 Supplementary Figure 4. Fine-granular opacification
- 9 pattern non-Oculentis IOL
- 10 Supplementary Figure 5. Crust-like opacification pattern
- 11 Supplementary Figure 6. Crust-like opacification pattern
- 12
