# Supplementary figures and images for: Analysis of opacification patterns in intraocular lenses (IOL)
Source: HighWire-hosted journal article supplement (doi:10.1136/bmjophth-2020-000589), 2021-02-01

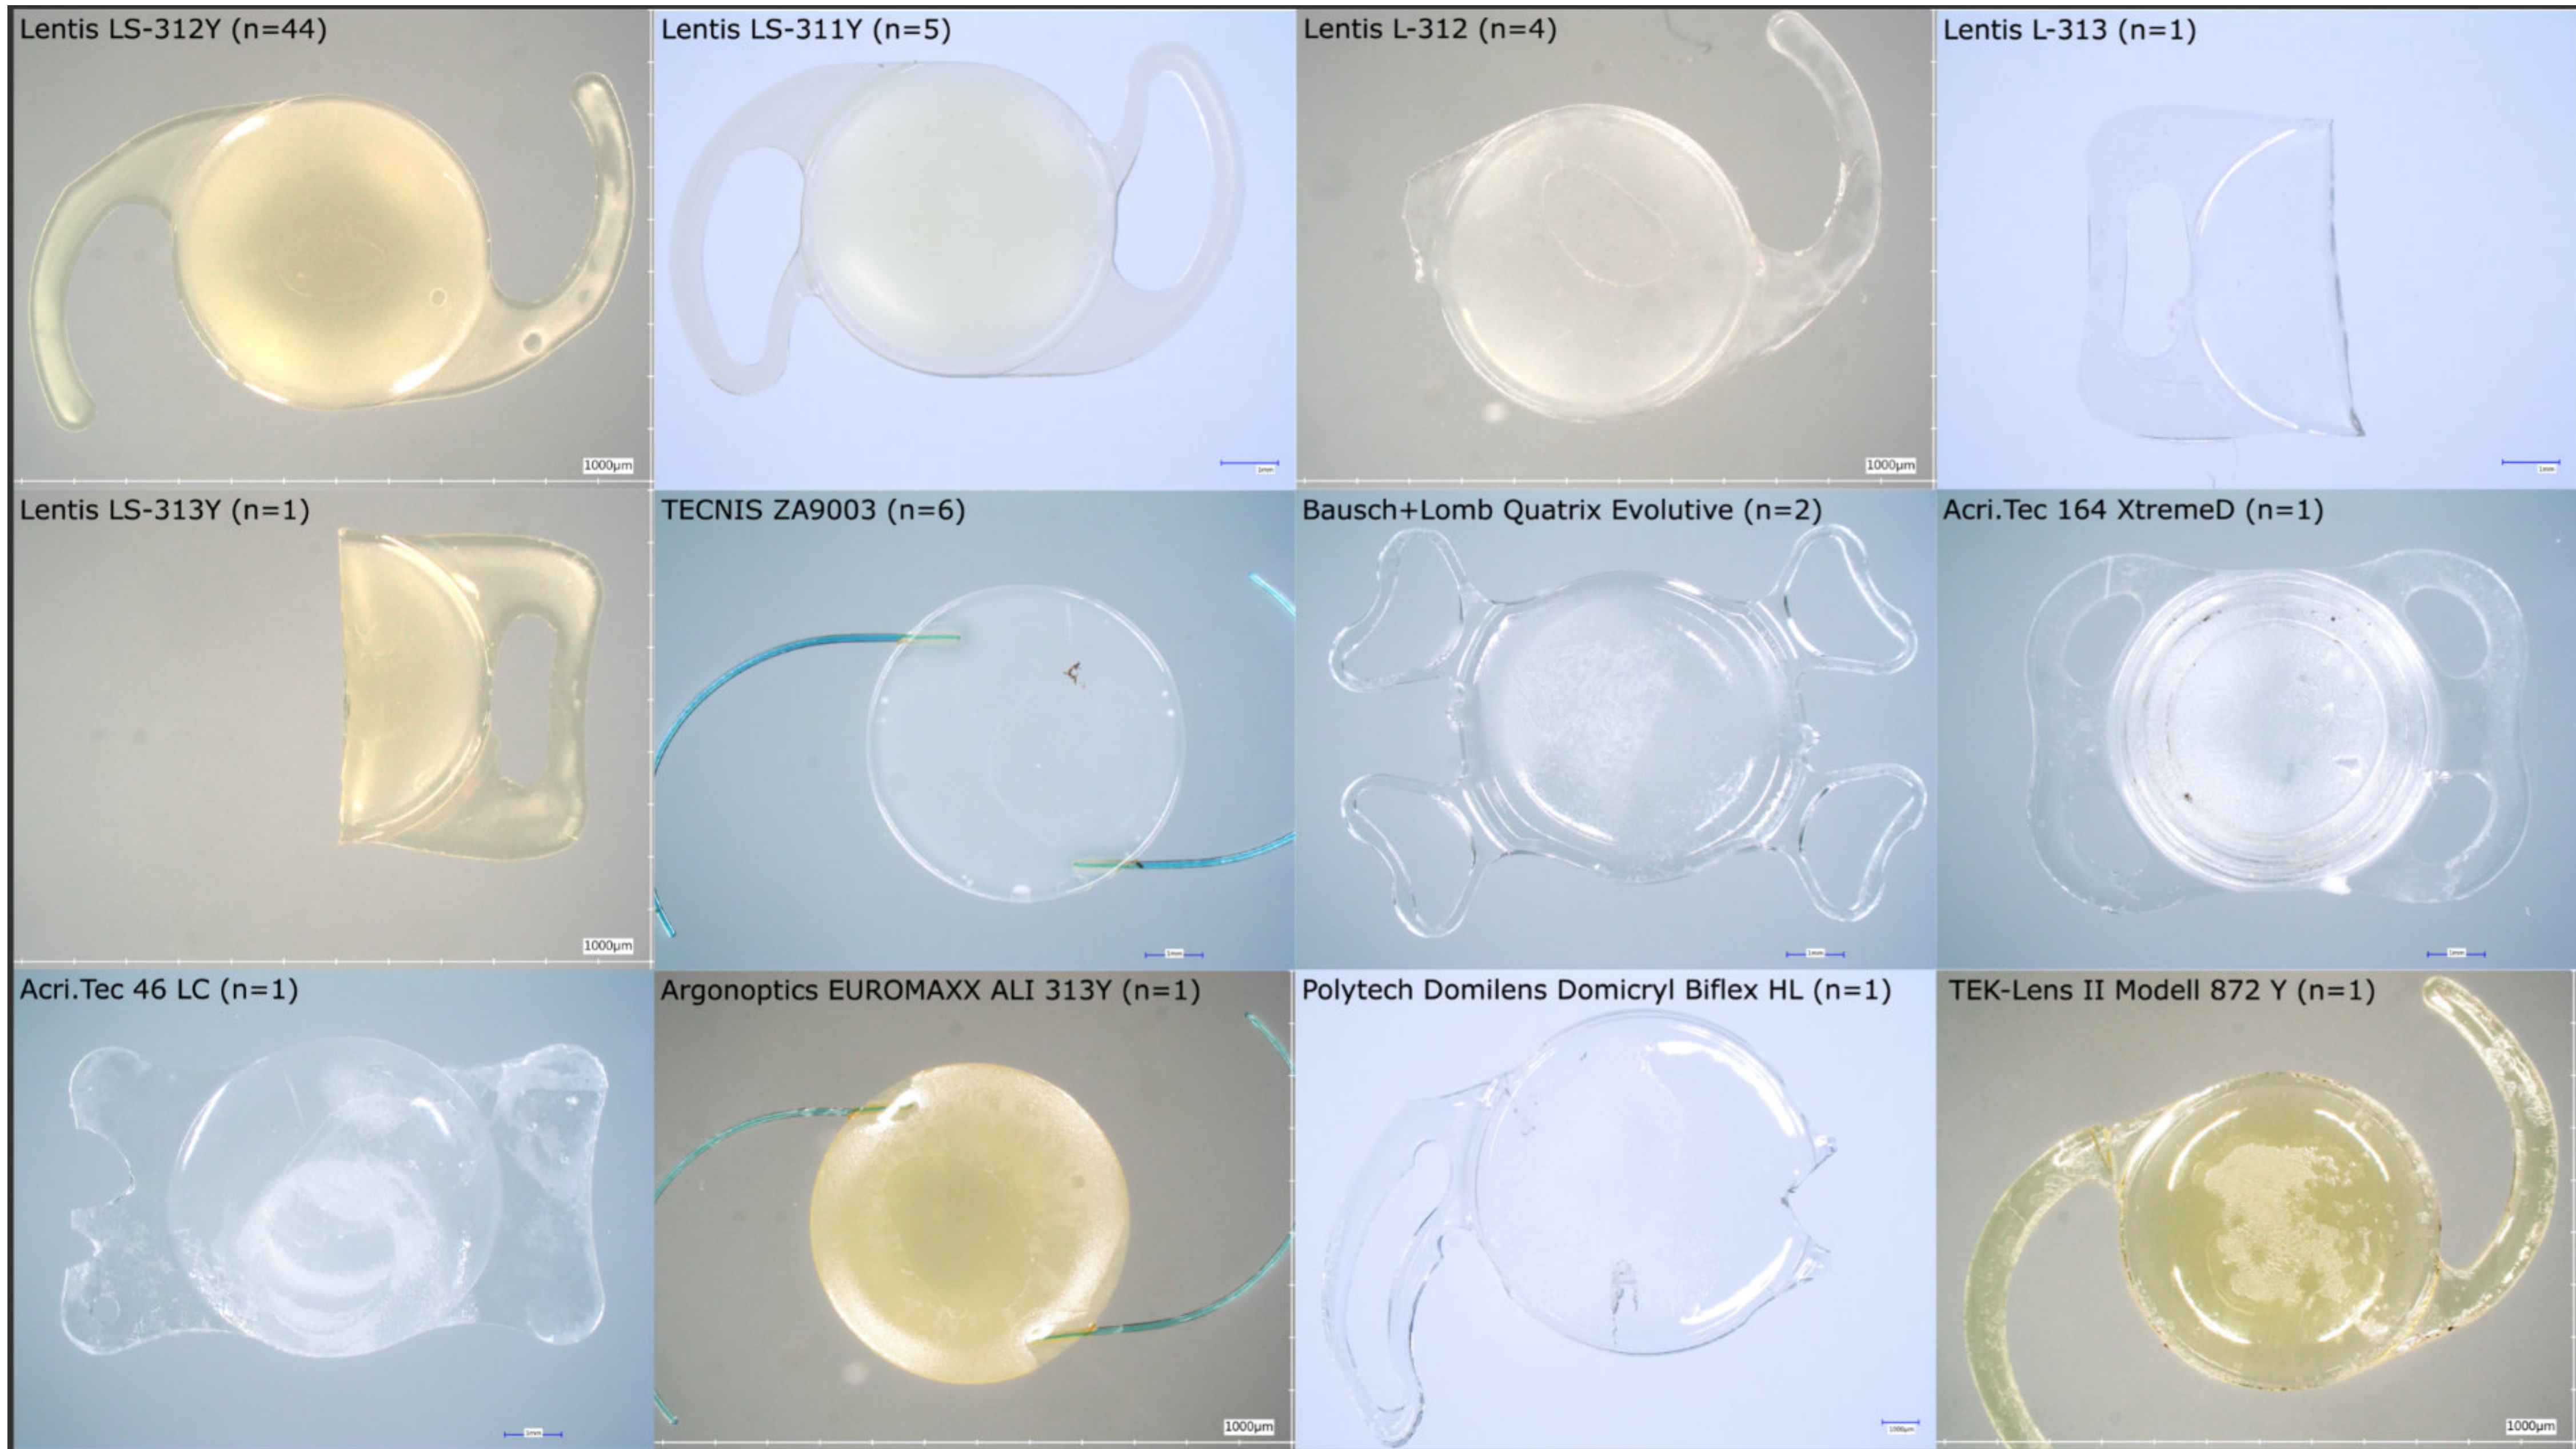

Supplement: bmjophth-2020-000589supp002_data_supplement.pdf [file bmjophth-2020-000589supp002_data_supplement.pdf]

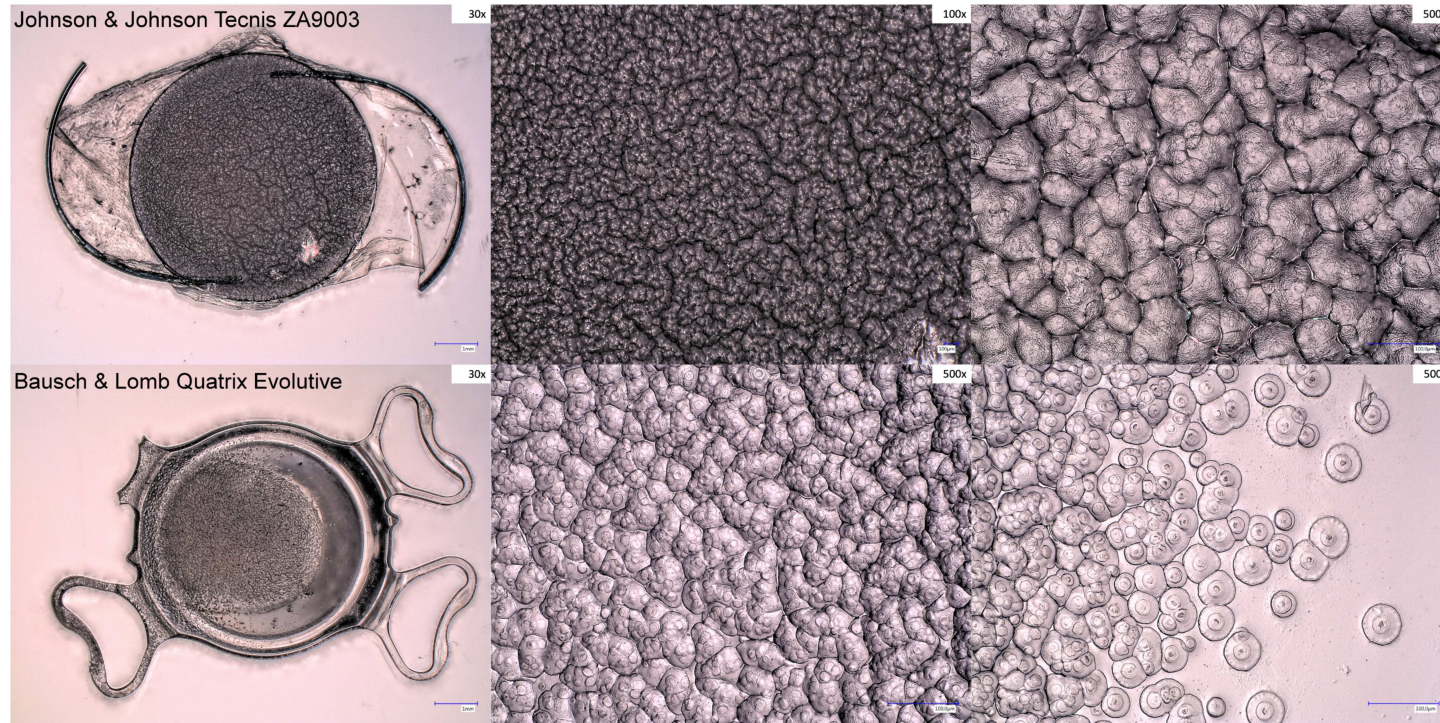

Supplement: bmjophth-2020-000589supp006_data_supplement.pdf [file bmjophth-2020-000589supp006_data_supplement.pdf]

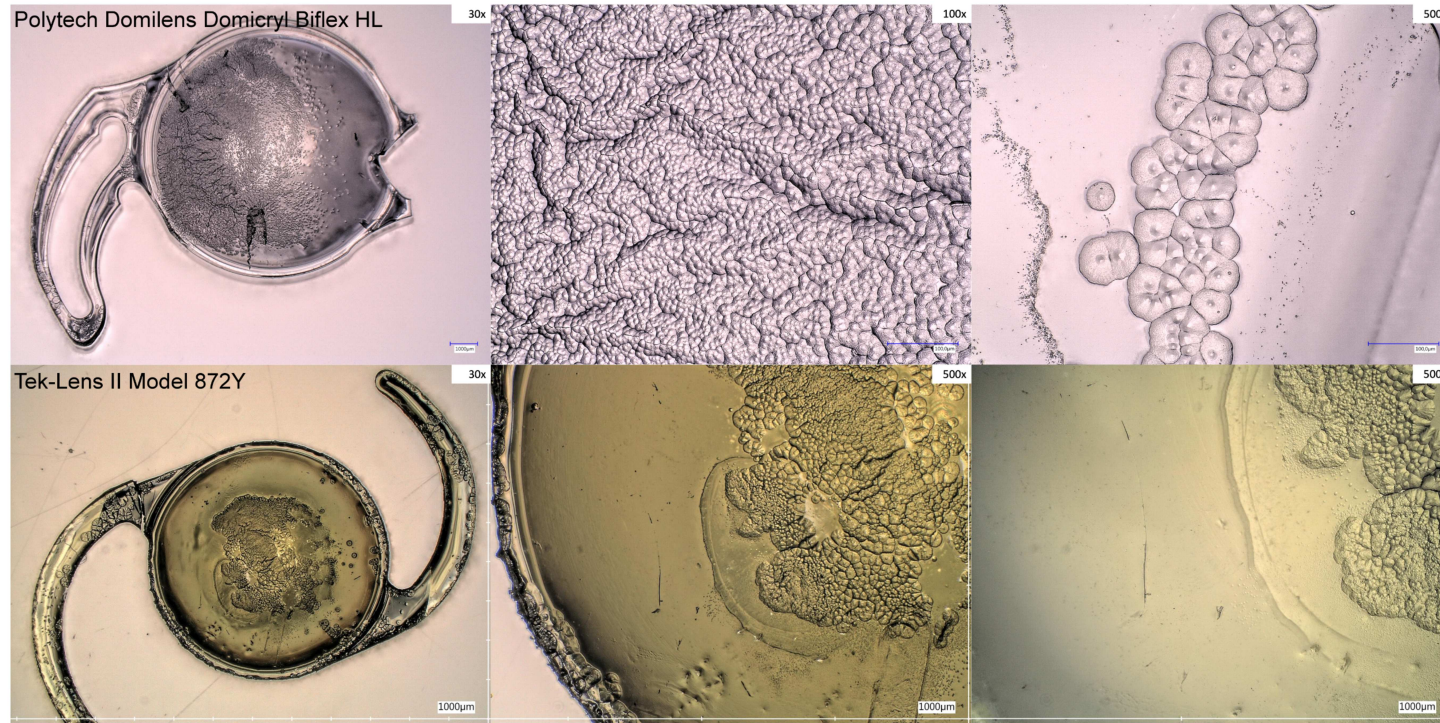

Supplement: bmjophth-2020-000589supp007_data_supplement.pdf [file bmjophth-2020-000589supp007_data_supplement.pdf]
